# Supplementary material for: Targeting Androgen Receptor Activation Function-1 with EPI to Overcome Resistance Mechanisms in Castration-Resistant Prostate Cancer
Source: Oxford University Press journal article supplement (doi:10.1158/1078-0432.ccr-15-2901), 2016-05-02
Supplement: 10780432ccr152901-sup-158843_1_supp_3453064_95p3n9.doc [file 10780432ccr152901-sup-158843_1_supp_3453064_95p3n9.doc]

**SUPPLEMENTARY MATERIALS AND METHODS**

**Plasmids and reagents**

AR-driven luciferase reporter genes PSA(6.1kb)-LUC and Probasin-LUC have been described . Plasmids containing: polymorphic human ARs with variable lengths of polyglutamine tract were from Dr. Mark Trifiro (Lady Davis Institute for Medical Research, Quebec) ; AR mutants from Dr. Diane Robins (University of Michigan Medical School, Ann Arbor, MI) ; p300 provided by Dr. Donald Tindall (Mayo Clinic, Rochester, MN) ; and SRC-1, SRC-2, and SRC-3 provided by Dr. Nancy Wiegel (Baylor College of Medicine, Houston, TX). R1881, a synthetic androgen, was from Perkin-Elmer (Wellesley, MA), bicalutamide from AstraZeneca (London, UK), and enzalutamide from Astellas. All other chemicals were purchased from Sigma, unless stated otherwise.

**Transfection and reporter assays**

All transfections were done in phenol red-free media. LNCaP cells (5 x 104 cells/well) or COS-1 cells (2.5 x 104 cells/well) were plated in 24-well plate. After 24 hours, LNCaP cells were transfected using serum-free media with constant amount of PSA(6.1kb)-LUC and various amounts of coactivators using Lipofectin (InvitrogenTM by Life Technologies, Carlsbad, CA), and COS-1 cells were transfected with constant amounts of PB-LUC and expression vectors for AR mutants (80ng/plate) or polymorphic AR with various CAG repeats (100ng/plate) using Fugene6 (Promega, Madison, WI). On day 3 cells were treated with inhibitors in the presence or absence of R1881. After incubation at 37°C and 5% CO2 for 48 hours (LNCaP) or 24 hours (COS-1), the cells were collected with Passive Lysis Buffer (Promega). Luciferase activities were measured by using the Luciferse Assay System (Promega) with the aid of GlowMax® 96 microplate luminometer (Promega).

**Cell proliferation assay**

LNCaP95 cells (7,500 cells/well) were plated in 96-well Falcon Primaria tissue culture plates in RPMI supplemented with 10% charcoal-stripped FBS (CSS) and then changed to serum-free media 2 days later. Cells were pre-treated with 10 µM antiandrogens (bicalutamide or enzalutamide), or 25 µM EPI-002 for 1 hour, then treated with 0.1 nM synthetic androgen R1881. Cellular proliferation was assessed 48 hours (2 days) after treatment by incubating with 100 µM of BrdU labeling agent for 2 hours at 37°C. All media was removed and the plates were dried in a Hybaid oven at 60°C for 1 hour. Cell Proliferation ELISA, BrdU (colorimetric) kit (Roche Applied Science, Mannheim, Germany) was applied following the manufacturer’s protocol, and ELISA was performed 30 minutes after substrate addition at 370 nm and 492 nm.

***In Vitro* Protein-Protein Binding Studies.** Protein-protein interactions were analyzed on a Scintistrip microtitre 96-well plate (PerkinElmer Life Sciences) utilizing both purified recombinant AR-AF1 and *in vitro* transcribed/translated 35S-labelled binding partners, SRC-1a-CTD (amio acids 977 to 1240), SRC2-CTD (amino acids 1120-1464) and SRC3-CTD (amino acids 1093-1412) . After adsorption of 200 nM AR-AF1 or BSA (control wells), all wells were blocked with BSA prior to incubation with radiolabelled SRC-CTDs for 1.5 h at room temperature with gentle shaking. Compounds 185-9-1 (2.66 mM) and EPI-001 (2.54 mM) were present throughout each step. Non-specific/non-bound radiolabelled proteins were removed with four washes of binding buffer with the addition of 1 mg/ml BSA and specific interactions measured by scintillation counting in a Micro counter (PerkinElmer Life Sciences). Interactions between radiolabelled and adsorbed proteins were calculated and normalized against non-specific binding to control proteins (BSA).

**Immunoprecipitation.**

LNCaP cells in serum-free and phenol red-free RMPI were pre-treated with EPI-001 (25µM) or DMSO (vehicle control) for 1 h and then subsequently treated for 6 h with 1nM R1881, 10nM R1881 or ethanol (vehicle). Cells were lysed with Triton X-100 lysis buffer (150 mM NaCl, 1% Triton X-100, 50 mM Tris HCl). Whole cell lysates were immunoprecipitated with a monoclonal antibody against the AR N-terminus peptide (AR441; Santa Cruz Biotechnology, CA, USA) followed by immunoblot probed with anti-SRC1 antibody (BD Biosciences, Franklin Lakes, NJ) and anti-AR (AR441) antibody.

**Steroid levels in xenografts**

Tumors were removed and 30-50 mg flash frozen for intratumoral steroid measurements as previously reported . Steroid measurements were performed at the University of Washington by mass spectrometry (MS).In brief, frozen tissue samples were homogenized in PBS. The homogenates were extracted with 8 mL of diethyl ether and the organic phase was decanted after freezing the aqueous phase in a dry ice/ethanol bath. Samples were added to internal standards: 50 pg of deuterated (D3)-DHT and D3-testosterone. The residue was then reconstituted in 0.5 mL of water before extraction with methylene chloride. The resulting oximes were analyzed by LC-MS-MS using a Waters Aquity HPLC and Premier XE mass spectrometer. Ions monitored were 350>309 and 347>306 for DHT-IS and DHT, respectively, and 307>124 and 304>124 for testosterone-IS and testosterone, respectively. This procedure results in a lower limit of quantitation of 100 and 500 attomol on column for testosterone and DHT, respectively. Intra-assay coefficients of variation generated using human serum for high-range, mid-range, and low-range samples are 3.5%, 3.1%, and 3.8% for testosterone and 6.3%, 4.3%, and 15.8% for DHT, respectively.

**Immunohistochemistry**

Sections (5 µm thick) were cut from formalin fixed paraffin-embedded tissues and deparaffinized in xylene and rehydrated in alcohols and distilled water. Endogenous peroxidase was blocked with 3% hydrogen peroxide in distilled water for 5 min, followed by washing in PBS three times. Incubation with the following primary antibodies: anti-AR N-20 (1:200; Santa Cruz), anti-AR C19 (1:200; Santa Cruz), anti-AR-V7 (1:200; Abcam), anti-Ki-67 (1:50; Dako), and anti-cleaved caspase-3 (1:50; Cell Signaling Technology) were done at 4°C overnight. Antigen was detected with 3,3-diaminobenzidine and counterstaining with hematoxylin. For TUNEL staining, The ApopTag® Fluorescein In Situ Apoptosis Detection Kit (MILLIPORE) was used. For AR and cleaved caspase-3 staining, the Dako EnVision+ System-HRP (DAB) kit was used according manufacturer’s protocol. Cells positive for Ki67, TUNEL, or caspase-3 staining were counted from different xenografts for each treatment.

**Supplementary Figure Legends**

**Figure S1. EPI increases apoptosis in LNCaP95 xenografts.**

Immunohistochemistry of representative sections of LNCaP95 xenografts stained for cleaved caspase-3. Scale bars (red) indicate 20 µm. % of caspase-3 positive cells were counted in xenograft sections of each treatment. At least 1000 cells per xenograft were counted. Total number of cells counted: 3287 (Control), 4238 (EPI-002), and 4262 (ENZA). Bar graphs are mean ± SEM with n = at least 3 different xenograft sections. One-way ANOVA was used for statistical analyses; *p < 0.05; **p < 0.01; ***p<0.001.

**Figure S2. Expression of AR-V7 and full-length AR in LNCaP95 xenografts.**

Immunohistochemistry of representative sections of LNCaP95 xenografts stained for AR-V7 and full-length (FL) AR. AR-V7 was stained by anti-AR-V7 antibody (Abcam) and FL AR was stained by anti-AR C19 antibody (Santa Cruz). Scale bars (red) indicate 20 µm.

Supplementary References:

1. Sadar MD. Androgen-independent induction of prostate-specific antigen gene expression via cross-talk between the androgen receptor and protein kinase A signal transduction pathways. The Journal of biological chemistry. 1999;274:7777-83.

2. Myung JK, Banuelos CA, Fernandez JG, Mawji NR, Wang J, Tien AH, et al. An androgen receptor N-terminal domain antagonist for treating prostate cancer. J Clin Invest. 2013;123:2948-60.

3. Southwell J, Chowdhury SF, Gottlieb B, Beitel LK, Lumbroso R, Purisima EO, et al. An investigation into CAG repeat length variation and N/C terminal interactions in the T877A mutant androgen receptor found in prostate cancer. J Steroid Biochem Mol Biol. 2008;111:138-46.

4. Steinkamp MP, O'Mahony OA, Brogley M, Rehman H, Lapensee EW, Dhanasekaran S, et al. Treatment-dependent androgen receptor mutations in prostate cancer exploit multiple mechanisms to evade therapy. Cancer Res. 2009;69:4434-42.

5. Debes JD, Schmidt LJ, Huang H, Tindall DJ. p300 mediates androgen-independent transactivation of the androgen receptor by interleukin 6. Cancer Res. 2002;62:5632-6.

6. Reid J, Murray I, Watt K, Betney R, McEwan IJ. The androgen receptor interacts with multiple regions of the large subunit of general transcription factor TFIIF. J Biol Chem. 2002;277:41247-53.

7. Mostaghel EA, Marck BT, Plymate SR, Vessella RL, Balk S, Matsumoto AM, et al. Resistance to CYP17A1 inhibition with abiraterone in castration-resistant prostate cancer: induction of steroidogenesis and androgen receptor splice variants. Clin Cancer Res. 2011;17:5913-25.
